# Supplementary material
Source: Springer Nature journal article supplement (https://www.springermedizin.de/resource/supplementary/13098_2013_285_MOESM2_ESM.pdf/9670914)

### Men (n=9,874)

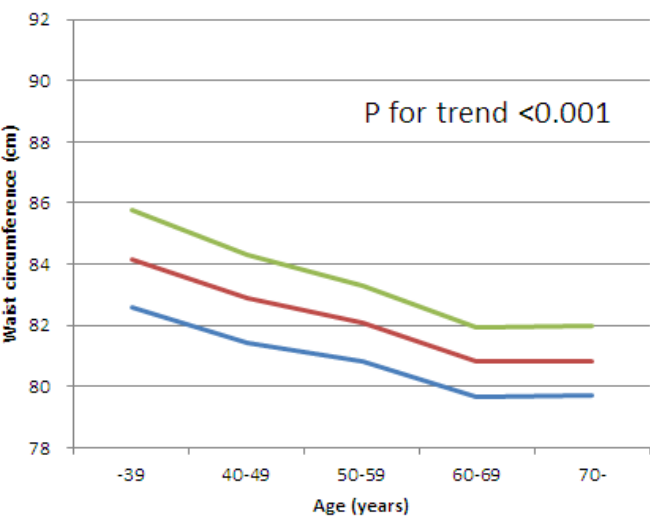

### Women (n=1,696)

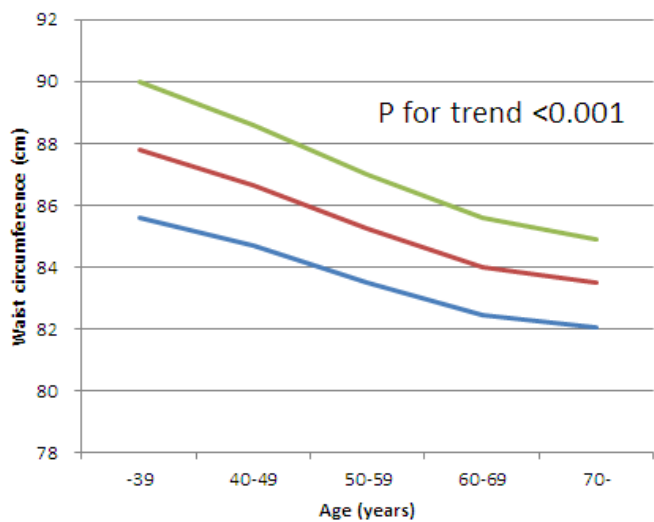

- VFA 80cm
- VFA 90cm
- VFA 100cm

### Men (n=9,874)

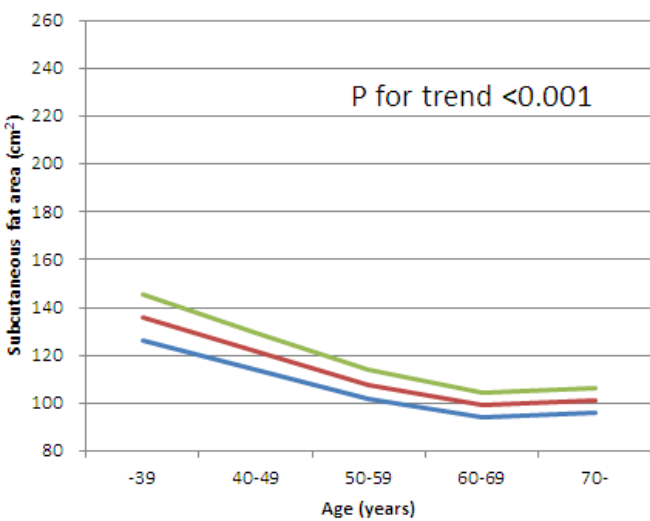

### Women (n=1,696)

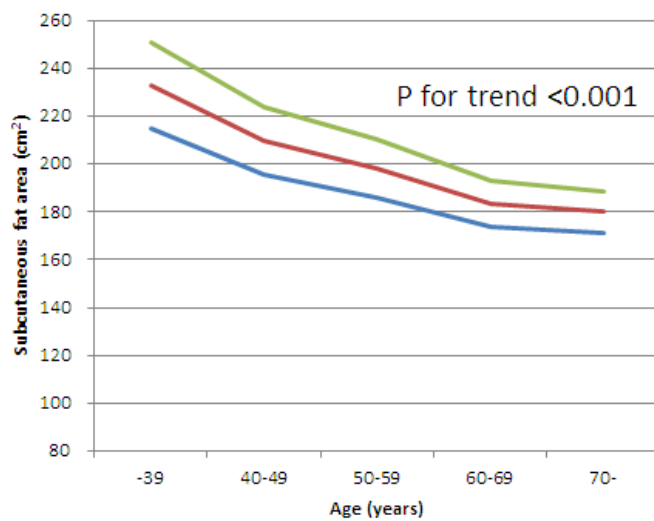

- VFA 80cm
- VFA 90cm
- VFA 100cm

Supplement: MOESM2 [file 9670914]
